# Supplementary material for: Capillary driven microfluidic sequential flow device for point-of-need ELISA: COVID-19 serology testing
Source: Royal Society of Chemistry journal article supplement (doi:10.1039/d3ay00225j), 2023-01-01
Supplement: d3ay00225j1.pdf [file d3ay00225j1.pdf]

## Supplementary Information

### Capillary Driven Microfluidic Sequential Flow Device for Point-of-Need ELISA:

### COVID-19 Serology Testing

Cody Carrell<sup>a,‡</sup>, Ilhoon Jang<sup>a,b,‡</sup>, Jeremy Link<sup>a</sup>, James S. Terry<sup>d</sup>, Zachary Call<sup>a</sup>, Yosita Panraksa<sup>e</sup>,  
Orawon Chailapakul<sup>e</sup>, David S. Dandy<sup>c,f</sup>, Brian J. Geiss<sup>d,f</sup>, and  
Charles S. Henry<sup>a,c,f\*</sup>

<sup>a</sup>Department of Chemistry, Colorado State University, CO, USA, 80523

<sup>b</sup>Institute of Nano Science and Technology, Hanyang University, Seoul, Korea, 04763

<sup>c</sup>Department of Chemical and Biological Engineering, Colorado State University, CO, USA, 80523

<sup>d</sup>Department of Microbiology, Immunology and Pathology, Colorado State University, CO, USA, 80523

<sup>e</sup>Program in Biotechnology, Faculty of Science, Chulalongkorn University, Bangkok, Thailand, 10330

<sup>f</sup>School of Biomedical Engineering, Colorado State University, CO USA 80523

\*Corresponding author: [Chuck.Henry@colostate.edu](mailto:Chuck.Henry@colostate.edu)

‡ C.C. and I.J. contributed equally to this work.

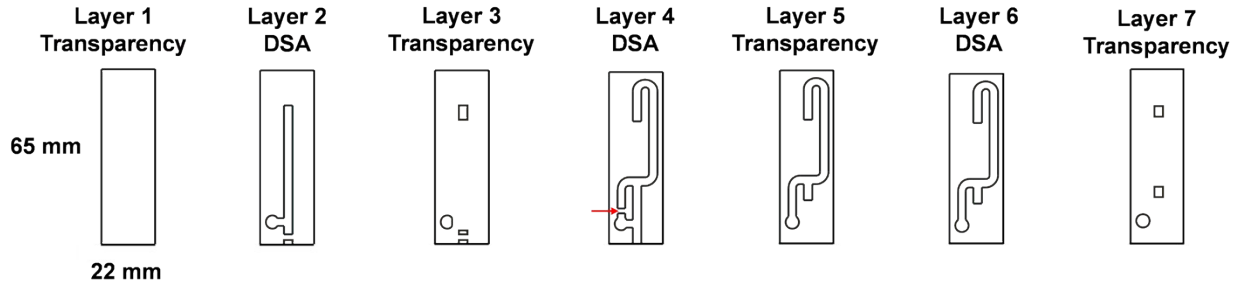

**Figure S1** Design of each layer of the dELISA. Layers are currently assembled by hand with the aid of a cold-press laminator. During assembly, the marked section on layer 4 of DSA is cut out to complete the connection in the channel. The DSA material that is cut is included initially to hold all layers together.

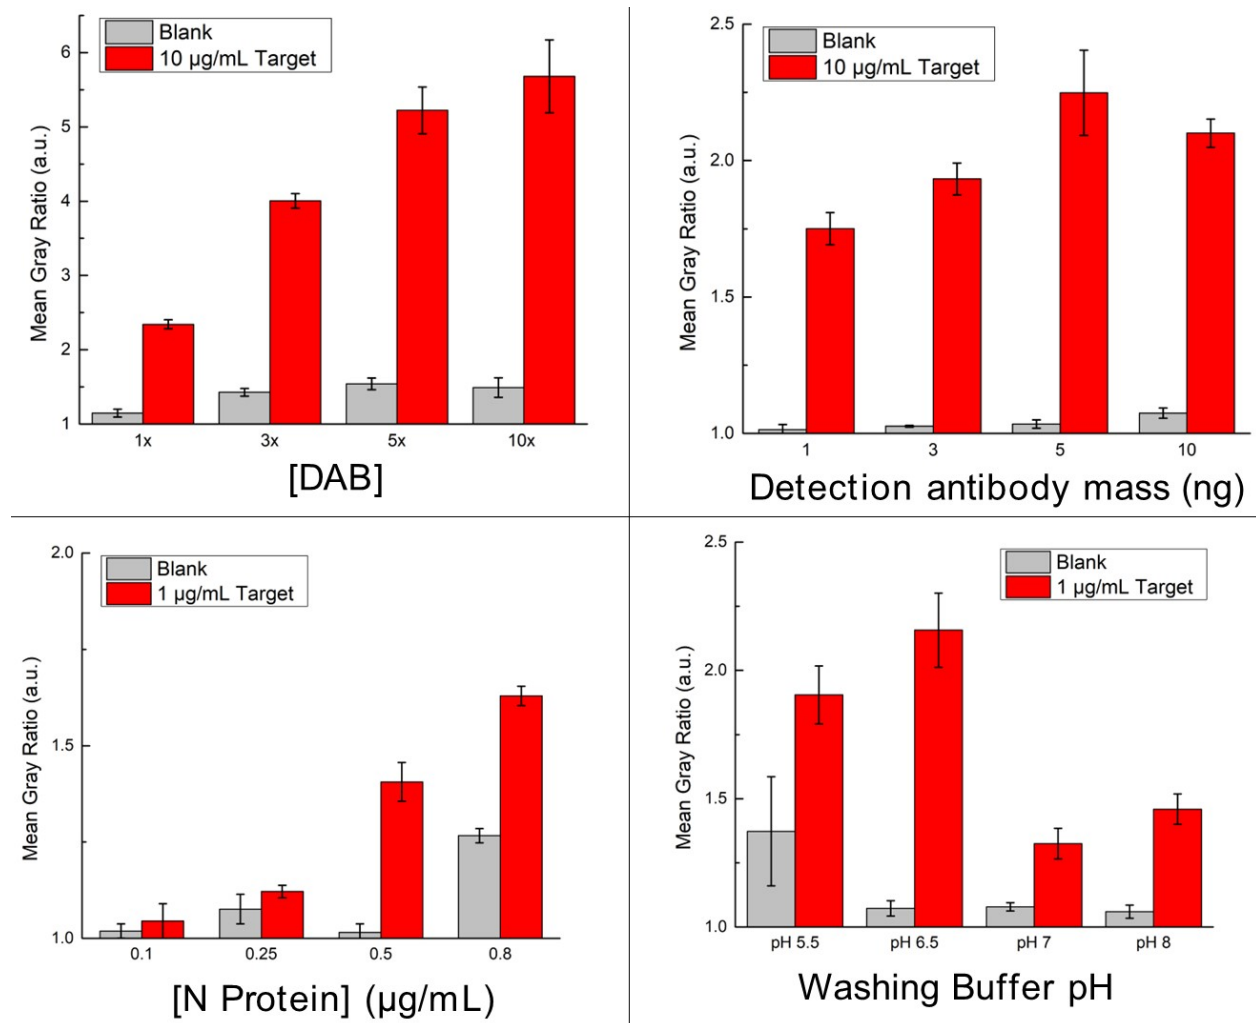

**Figure S2** The signal and noise (blank) values used to generate Fig. 3 in the main text.

4-Parameter Logistic model used to fit the data from the dose-response curve. Y is the signal, x is the target concentration, a is the expected response (Y) at x=0, b is the slope of the curve at point c, which is the target concentration that corresponding to  $Y=(a+d)/2$ , and d is the expected response when the target concentration is infinitely high (Assuming no hook effect).

$$Y = d + \frac{a - d}{1 + \left(\frac{x}{c}\right)^b} \quad (\text{Eq S1})$$

The equation used to calculate the detection limit from the 4-parameter logistic fit. Parameters a, b, c, and d are defined in Equation S1 above.  $SD_b$  is the standard deviation of the blank and  $R_b$  is the response or signal of the blank.

$$LOD = c \times \left( \left( \frac{(a - d)}{(3 \cdot SD_b + R_b) - d} \right) - 1 \right)^{\frac{1}{b}} \quad (\text{Eq S2})$$
